# Supplementary material for: The thorax musculature of Anisoptera (Insecta: Odonata) nymphs and its evolutionary relevance
Source: PubMed Central journal article supplement (PMC4228402; doi:10.1186/1471-2148-13-237), 2013-11-01
Supplement: 1471-2148-13-237-S1.pdf [file 1471-2148-13-237-S1.pdf]

**Additional file 1:** Attachmentpoints of the thorax musculature of *Sympetrum vulgatum*

| Abbreviation                | Name                            | Origin                                             | Insertion                  |
|-----------------------------|---------------------------------|----------------------------------------------------|----------------------------|
| <b>Prothorax</b>            |                                 |                                                    |                            |
| Dorsal longitudinal muscles |                                 |                                                    |                            |
| <b>Idlm1</b>                | Musculus prophragma-occipitalis | Apex of tergal apophysis 2                         | Median at the postocciput  |
| <b>Idlm3</b>                | M. prophragma-cervicalis        | Tergal apophysis 1                                 | Base of tergal apophysis 2 |
| <b>Idlm4</b>                | M. cervico-occipitalis dorsalis | Tergal apophysis 1                                 | Median at postocciput      |
| Dorsoventral muscles        |                                 |                                                    |                            |
| <b>Idvm10</b>               | M. profurca-phragmalis          | Apex of profurca                                   | Apex of tergal apophysis 2 |
| <b>Idvm15</b>               | M. propleuro-coxalis superior   | Anterolateral portion of tergite 1                 | Anterior procoxal rim      |
| <b>Idvm18</b>               | M. pronto-coxalis lateralis     | Postero-lateral portion of tergite 1               | Procoxal disk              |
| Pleuro-coxal muscles        |                                 |                                                    |                            |
| <b>Ipcm8</b>                | M. propleuro-trochanteralis     | Episternum 1                                       | Tendon of protrochanter    |
| <b>Ipcm9</b>                | M. protergro-trochanteralis     | Lateral portion of tergite 1, close to the pleura. | Tendon of protrochanter    |
| Sterno-coxal muscles        |                                 |                                                    |                            |
| <b>Iscm2</b>                | M. profurca-coxalis posterior   | External side of the base of profurca              | Posterior procoxal rim     |
| <b>Iscm6</b>                | M. profurca-trochanteralis      | External side of the base of profurca              | Tendon of protrochanter    |
| Sterno-pleural muscles      |                                 |                                                    |                            |
| <b>Ispm1</b>                | M. profurca-apodemalis          | Apex of profurca                                   | Apodem of propleura        |
| Tergo-pleural muscles       |                                 |                                                    |                            |

|                                     |                                      |                                          |                                      |
|-------------------------------------|--------------------------------------|------------------------------------------|--------------------------------------|
| <b>ltpm3</b>                        | M. pronoto-pleuralis anterior        | Lateral side of tergite 1                | Episternum 1                         |
| <b>ltpm7</b>                        | M. protergo-cervicalis posterior     | Lateral part of tergite 1                | Lateral of cervix membrane           |
| <b>ltpm8</b>                        | M. protergo-cervicalis anterior      | Most antero-lateral part of tergite 1    | Lateral of cervix membrane           |
| <b>ltpm9</b>                        | M. protergo-preepisternalis          | Tergite 1, lateral of tergal apophysis 2 | Base of preepisternalapodem 1        |
| <b>ltpm10</b>                       | M. prosterna-coxalis dextra          | Apex of right preepisternalapodem 1      | Anterior of left procoxal rim        |
| <b>ltpm11</b>                       | M. prosterna-coxalis sinister        | Apex of left preepisternalapodem 1       | Anterior of right procoxal rim       |
| <b>Ventral longitudinal muscles</b> |                                      |                                          |                                      |
| <b>ivlm3</b>                        | M. profurca-tentorialis              | Apex of profurca                         | Cranial tentorial bar                |
| <b>ivlm7</b>                        | M. profurca-mesofurcalis             | Furca-branch 2                           | Furca 1                              |
| <b>Mesothorax</b>                   |                                      |                                          |                                      |
| <b>Dorsal longitudinal muscles</b>  |                                      |                                          |                                      |
| <b>lldlm1</b>                       | M. prophragma-mesophragmalis         | Tergal apophysis 3                       | Tergal apophysis 4                   |
| <b>Dorsoventral muscles</b>         |                                      |                                          |                                      |
| <b>lldvm1</b>                       | M. mesonoto-sternalis                | Base of Mesofurca                        | Postero-lateral edge of mesowing bud |
| <b>lldvm3</b>                       | M. mesonoto-trochantinalis posterior | Base of Mesofurca                        | Antero-lateral edge of mesowing bud  |
| <b>lldvm4</b>                       | M. mesonoto-coxalis anterior         | Antero-lateral edge of mesocoxa          | Antero-lateral edge of mesowing bud  |
| <b>lldvm5</b>                       | M. mesonoto-coxalis posterior        | Mesocoxaldisk                            | Antero-lateral edge of mesowing bud  |

|                               |                                     |                                                                |                                                                 |
|-------------------------------|-------------------------------------|----------------------------------------------------------------|-----------------------------------------------------------------|
| <b>lldvm6</b>                 | M. mesocoxa-subalaris               | Lateral part of tergite 2                                      | Postero-lateral apodem of mesocoxa                              |
| <b>Pleuro-coxal muscles</b>   |                                     |                                                                |                                                                 |
| <b>llpcm1</b>                 | M. mesanepisterno-trochantinalis    | Preepisternum 2                                                | Lateral of the tergal apophysis 2 at tergite 2                  |
| <b>llpcm2</b>                 | M. mesobasalare-trochantinalis      | Base of preepisternal apodem 2                                 | Lateral of the tergal apophysis 2 at tergite 2                  |
| <b>llpcm4</b>                 | M. mesanepisterno-coxalis posterior | Interpleuralridge 2                                            | Antero-external part of mesocoxa                                |
| <b>llpcm6</b>                 | M. mesopleura-trochanteralis        | Dorsal part of Katepisternum 2                                 | Tendon of mesotrochanter                                        |
| <b>Sterno-coxal muscles</b>   |                                     |                                                                |                                                                 |
| <b>llscm1</b>                 | M. mesofurca-coxalis anterior       | Lateral base of Mesofurca                                      | Antero-external ridge of mesocoxa                               |
| <b>llscm2</b>                 | M. mesofurca-coxalis posterior      | Lowermost part of mesofurca                                    | Postero-lateral apodem of mesocoxa                              |
| <b>llscm3</b>                 | M. mesofurca-coxalis medialis       | Lateral base of mesofurca                                      | Postero-lateral apodem of mesocoxa                              |
| <b>llscm6</b>                 | M. mesofurca-trochanteralis         | Latero-external side of mesofurca                              | Tendon of mesotrochanter                                        |
| <b>llscm7</b>                 | M. mesospina-metacoxalis            | Preepisternal apodem                                           | Anterolateral edge of metacoxa                                  |
| <b>Sterno-pleural muscles</b> |                                     |                                                                |                                                                 |
| <b>llspm2</b>                 | M. mesofurca-pleuralis              | Apex of mesofurca                                              | Interpleural ridge 2                                            |
| <b>Tergo-pleural muscles</b>  |                                     |                                                                |                                                                 |
| <b>lltpm3</b>                 | M. mesonoto-basalaris               | Dorsal side of mesowing bud, anterior to the origin of lltpm4  | Ventral side of mesowing bud, anterior to origin of lltpm4      |
| <b>lltpm4</b>                 | M. mesonoto-pleuralis anterior      | Dorsal side of mesowing bud, posterior to the origin of lltpm3 | Ventral side of mesowing bud, posterior to the origin of lltpm3 |

|                                     |                                  |                                         |                                               |
|-------------------------------------|----------------------------------|-----------------------------------------|-----------------------------------------------|
| <b>IItpm6</b>                       | M. mesonoto-pleuralis posterior  | Upper portion of interpleural ridge 2   | Antero-dorsal edge of mesowing bud            |
| <b>IItpm7</b>                       | M. mesanepisterno-axillaris      | Ventral part of epimeron 2              | Lateral edge of mesowing bud                  |
| <b>IItpm8</b>                       | M. mesepimero-axillaris secundus | Ventral part of epimeron 2              | Lateral edge of mesowing bud                  |
| <b>IItpm9</b>                       | M. mesepimero-axillaris tertius  | Dorsal part of epimeron 2               | Inner side of ventral portion of mesowing bud |
| <b>IItpm10</b>                      | M. mesepimero-subalaris          | Interpleural ridge 2                    | Lateral edge of mesowing bud                  |
| <b>Ventral longitudinal muscles</b> |                                  |                                         |                                               |
| <b>IIvlm6</b>                       | M. mesospina-abdominosternalis   | Posterior part of preepisternalapodem 3 | Antecostal apodem                             |
| <b>IIvlm7</b>                       | M. mesofurca-abdominosternalis   | Mesofurca                               | Within the Abdomen                            |
| <b>Metathorax</b>                   |                                  |                                         |                                               |
| <b>Dorsal longitudinal muscles</b>  |                                  |                                         |                                               |
| <b>IIIdlm1</b>                      | M. mesophragma-metaphragmalis    | Tergal apophys 4                        | Transversal ridge between abdomen and thorax  |
| <b>IIIdlm2</b>                      | M. metanoto-phragmalis           | Tergal apophysis 4                      | Transversal ridge between abdomen and thorax  |
| <b>Dorsoventral muscles</b>         |                                  |                                         |                                               |
| <b>IIIdvm1</b>                      | M. mesonoto-sternalis            | Base of Metafurca                       | Postero-lateral edge of metawing bud          |
| <b>IIIdvm3</b>                      | M. metanoto-trochantinalis       | Base of Metafurca                       | Antero-lateral edge of metawing bud           |
| <b>IIIdvm4</b>                      | M. metanoto-coxalis anterior     | Anterio-lateral edge of metaocoxa       | Antero-lateral edge of metawing bud           |
| <b>IIIdvm5</b>                      | M. metanoto-coxalis posterior    | Metacoxaldisk                           | Antero-lateral edge of metawing bud           |

|                               |                                     |                                                                |                                                             |
|-------------------------------|-------------------------------------|----------------------------------------------------------------|-------------------------------------------------------------|
| <b>IIldvm6</b>                | M. metacoxa-subalaris               | Lateral part of tergite 3                                      | Postero-lateral part of metacoxa                            |
| <b>IIIldvm8</b>               | M. metanoto-phragmalis              | Dorsal portion of the posterior ridge of epimeron 3            | Posterior end of metafurca                                  |
| <b>Pleuro-coxal muscles</b>   |                                     |                                                                |                                                             |
| <b>IIIpcm1</b>                | M. metanepisterno-trochantinalis    | Preepisternum 3                                                | Lateral of the tergal apophysis 3 at tergite 3              |
| <b>IIIpcm2</b>                | M. metabasalare-trochantinalis      | Base of Preepisternal apodem 3                                 | Lateral of the tergal apophysis 3 at tergite 3              |
| <b>IIIpcm4</b>                | M. metanepisterno-coxalis posterior | Interpleuralridge 3                                            | Antero-external part of metacoxa                            |
| <b>IIIpcm6</b>                | M. mesopleura-trochanteralis        | Dorsal part of Katepisternum 3                                 | Tendon of metatrochanter                                    |
| <b>Sterno-coxal muscles</b>   |                                     |                                                                |                                                             |
| <b>IIIscm1</b>                | M. metafurca-coxalis anterior       | Lateral base of Metafurca                                      | Antero-external ridge of metacoxa                           |
| <b>IIIscm2</b>                | M. metafurca-coxalis posterior      | Lowermost part of metafurca                                    | Postero-lateral apodem of metacoxa                          |
| <b>IIIscm3</b>                | M. metafurca-coxalis medialis       | Lateral base of metafurca                                      | Postero-lateral apodem of metacoxa                          |
| <b>IIIscm4</b>                | M. metafurca-coxalis lateralis      | Apex of metafurca                                              | Lateral base of metacoxa, at the border of pleurite         |
| <b>IIIscm6</b>                | M. metafurca-trochanteralis         | Latero-external side of metafurca                              | Tendon of metatrochanter                                    |
| <b>Sterno-pleural muscles</b> |                                     |                                                                |                                                             |
| <b>IIIspm2</b>                | M. metafurca-pleuralis              | Apex of metafurca                                              | Interpleural ridge 3                                        |
| <b>Tergo-pleural muscles</b>  |                                     |                                                                |                                                             |
| <b>IIItpm3</b>                | M. metanoto-basalaris               | Dorsal side of metawing bud, anterior to the origin of IIItpm4 | Ventral side of metawing bud, anterior to origin of IIItpm4 |

|                                     |                                  |                                                          |                                                                  |
|-------------------------------------|----------------------------------|----------------------------------------------------------|------------------------------------------------------------------|
| <b>IIItpm4</b>                      | M. metanoto-pleuralis anterior   | side of metawing bud, posterior to the origin of IIItpm3 | Ventral side of metawing bud, posterior to the origin of IIItpm3 |
| <b>IIItpm6</b>                      | M. metanoto-pleuralis posterior  | Upper portion of interpleural ridge 3                    | Antero-dorsal edge of metawing bud                               |
| <b>IIItpm7</b>                      | M. metanepisterno-axillaris      | Ventral part of epimeron 3                               | Lateral edge of metawing bud                                     |
| <b>IIItpm8</b>                      | M. metapimero-axillaris secundus | Ventral part of epimeron 3                               | Lateral edge of metawing bud                                     |
| <b>IIItpm9</b>                      | M. metapimero-axillaris tertius  | Dorsal part of epimeron 3                                | Inner side of ventral portion of metawing bud                    |
| <b>IIItpm10</b>                     | M. metapimero-subalaris          | Interpleural ridge 3                                     | Lateral edge of metawing bud                                     |
| <b>Ventral longitudinal muscles</b> |                                  |                                                          |                                                                  |
| <b>IIIvlm2</b>                      | M. mesofurca-abdominosternalis   | part of Metafurca (close to the prefurca invagination)   | Within the abdomen (second abdominal sternite)                   |
| <b>IIIvlm3</b>                      | M. metaspina-abdominosternalis   | Poststernum 3                                            | the abdomen (second abdominal sternite)                          |
