# Supplementary material for: The thorax musculature of Anisoptera (Insecta: Odonata) nymphs and its evolutionary relevance
Source: PubMed Central journal article supplement (PMC4228402; doi:10.1186/1471-2148-13-237), 2013-11-01
Supplement: 1471-2148-13-237-S2.pdf [file 1471-2148-13-237-S2.pdf]

| Friedrich & Beutel (2008) | this study | Büsse et al. (2013) | Asahina (1954) | Willkommen (2008) | Wittig (1955) | Matsuda (1970)  |
|---------------------------|------------|---------------------|----------------|-------------------|---------------|-----------------|
| Prothorax                 |            |                     |                |                   |               |                 |
| ldlm1                     | x          | ?                   | 3              | ?                 | l dlm 10      | op-t 3          |
| ldlm2                     | -          | ?                   | -              | ?                 | 0 dlm 1       | op-t 2          |
| ldlm3                     | x          | ?                   | 2              | ?                 | l dlm 11b     | cv(d)-t 1, t 14 |
| ldlm4                     | x          | ?                   | 1              | ?                 | 0 dlm 2       | op-t 1          |
| ldlm5                     | -          | ?                   | -              | ?                 | l dlm 12      | t 12            |
| ldlm6                     | -          | ?                   | -              | ?                 | l dlm 12?     | t 13            |
| ldvm1                     | -          | ?                   | -              | ?                 | 0 lm 7        | op-cv 1         |
| ldvm2                     | -          | ?                   | -              | ?                 | 0 lm 7        | op-cv 2         |
| ldvm3                     | -          | ?                   | -              | ?                 | 0 lm 8        | op-cv 3         |
| ldvm4                     | -          | ?                   | -              | ?                 | 0 lm 5        | t-s(cv) 1?      |
| ldvm5                     | -          | ?                   | -              | ?                 | -             | t-cv 1          |
| ldvm6                     | -          | ?                   | -              | ?                 | 0 lm 6        | t-cv 2          |
| ldvm7                     | -          | ?                   | -              | ?                 | -             | t-cv 3          |
| ldvm8                     | -          | ?                   | -              | ?                 | -             | t-s(cv) 9       |
| ldvm9                     | -          | ?                   | -              | ?                 | -             | op-s 2, p-s 3   |
| ldvm10                    | x          | ?                   | -              | ?                 | l ism 22      | t-s 1           |
| ldvm11                    | -          | ?                   | -              | ?                 | l ism 24      | t-s 8           |
| ldvm12                    | -          | ?                   | -              | ?                 | -             | t-s 2           |
| ldvm13                    | -          | ?                   | -              | ?                 | l dvm 15      | t-ti(cx) 2      |
| ldvm14                    | -          | ?                   | -              | ?                 | l dvm 16      | t-ti(cx) 3      |
| ldvm15                    | x          | ?                   | 13             | ?                 | l dvm 17?     | t-ti(cx) 1      |
| ldvm16                    | -          | ?                   | -              | ?                 | l dvm 19      | t-cx 5          |
| ldvm17                    | -          | ?                   | -              | ?                 | l dvm 20      | t-cx 6, t-cx 7  |
| ldvm18                    | x          | ?                   | 14 & 15        | ?                 | l dvm 21      | t-cx 8          |
| ldvm19                    | -          | ?                   | -              | ?                 | l dvm 18      | t-tr 1          |

Additional file 2: Homologisation of thoracic muscle nomenclatures used by several authors

"-" absent / "?" uncertain or no information

|       |        |   |    |   |           |                  |
|-------|--------|---|----|---|-----------|------------------|
| ltpm1 | -      | ? | -  | ? | -         | op-p 2           |
| ltpm2 | -      | ? | -  | ? | 0 lm 9    | op-p 1, t-p 3    |
| ltpm3 | x      | ? | 12 | ? | l tpm 25  | -                |
| ltpm4 | -      | ? | -  | ? | l tpm 26  | t-p 14?          |
| ltpm5 | -      | ? | -  | ? | l tpm 27? | t-p 15?          |
| ltpm6 | -      | ? | -  | ? | -         | t-p 1, t-p 2     |
| -     | ltpm7  | ? | 4  | ? | ?         | ?                |
| -     | ltpm8  | ? | 5  | ? | ?         | ?                |
| -     | ltpm9  | ? | 7  | ? | ?         | ?                |
| -     | ltpm10 | ? | 9  | ? | ?         | ?                |
| -     | ltpm11 | ? | 10 | ? | ?         | ?                |
| lspm1 | x      | ? | -  | ? | l zm 34   | p-s1             |
| lspm2 | -      | ? | -  | ? | -         | p-s 2            |
| lspm3 | -      | ? | -  | ? | -         | p-s 6            |
| lspm4 | -      | ? | -  | ? | -         | p-s 7            |
| lspm5 | -      | ? | -  | ? | -         | p-s 5            |
| lspm6 | -      | ? | -  | ? | -         | p-s 4            |
| lspm7 | -      | ? | -  | ? | -         | p-s 10           |
| lpcm1 | -      | ? | -  | ? | -         | cv-cx 3          |
| lpcm2 | -      | ? | -  | ? | -         | cv-cx 1, cv-cx 2 |
| lpcm3 | -      | ? | -  | ? | -         | p-ti(cx) 1       |
| lpcm4 | -      | ? | -  | ? | -         | p-cx 4           |
| lpcm5 | -      | ? | -  | ? | l cpm 28  | p-cx 5           |
| lpcm6 | -      | ? | -  | ? | -         | p-cx 6, p-cx 9   |
| lpcm7 | -      | ? | -  | ? | -         | p-cx 7           |
| lpcm8 | x      | ? | 18 | ? | l cpm 29  | p-tr 1, p-tr 2   |
| -     | lpcm9  | ? | 17 | ? | ?         | ?                |
| lvlm1 | -      | ? | -  | ? | 0 vlm 4   | cv-s 1, cv-s 4?  |
| lvlm2 | -      | ? | -  | ? | -         | op-cv(v) 4       |

Additional file 2: Homologisation of thoracic muscle nomenclatures used by several authors

"-" absent / "?" uncertain or no information

|                   |   |   |     |               |                      |                |
|-------------------|---|---|-----|---------------|----------------------|----------------|
| IvIm3             | x | ? | 11  | ?             | 0 vIm 3              | s 1, s 2       |
| IvIm4             | - | ? | -   | ?             | I vIm 14             | s 14, s16      |
| IvIm5             | - | ? | -   | ?             | -                    | s 17           |
| IvIm6             | - | ? | -   | ?             | -                    | s 15           |
| IvIm7             | x | ? | 41  | ?             | I vIm 13             | s 13           |
| IvIm8             | - | ? | -   | ?             | -                    | s 11           |
| IvIm9             | - | ? | -   | ?             | -                    | s 12           |
| Iscm1             | - | ? | -   | ?             | I bm 30              | s-cx 5         |
| Iscm2             | x | ? | 16  | ?             | I bm 33              | s-cx 3         |
| Iscm3             | - | ? | -   | ?             | I bm 32              | s-cx 6         |
| Iscm4             | - | ? | -   | ?             | -                    | s-cx 2         |
| Iscm5             | - | ? | -   | ?             | -                    | s-cx 4         |
| Iscm6             | x | ? | 19  | ?             | I bm 31              | s-tr 1         |
| Iscm7             | - | ? | -   | ?             | -                    | s-cx 1, s-cx 7 |
| <b>Mesothorax</b> |   |   |     |               |                      |                |
| IIdIm1            | x | x | 25  | MT.m          | II dIm 35            | t 14           |
| IIdIm2            | - | - | -   | S.LP?m        | II dIm 36, II dIm 37 | t12, t13       |
| IIdIm3            | - | - | -   | S.Esm         | -                    | t-p 5, t-p 6   |
| IIdvM1            | x | x | 23' | S.CmA         | II dvm 40            | t-ti 1, t-ti 2 |
| IIdvM2            | - | - | -   | S.CmA         | II dvm 41            | t-ti 3         |
| IIdvM3            | x | x | 23  | -             | -                    | t-cx 5         |
| IIdvM4            | x | x | 26  | PSL.Cm, S.CmP | II dvm 43            | t-cx 6, t-cx 7 |
| IIdvM5            | x | x | 27  | SA.Cm, SA.Fm  | II dvm 43            | t-cx 8         |
| IIdvM6            | x | - | -   | S.Trm         | II cpm 53            | t-tr 1         |
| IIdvM7            | - | - | -   | -             | II dvm 42            | t-s 1          |
| IIdvM8            | - | - | -   | -             | II ism 44            | t-s 8, t-s 7 ? |
| IIdvM9            | - | - | -   | A?.Pm         | -                    | t-p 3          |
| IItpm1            | - | - | -   | BA.Pm         | II tpm 46a           | t-p 4, t-p 20  |

Additional file 2: Homologisation of thoracic muscle nomenclatures used by several authors

"-" absent / "?" uncertain or no information

|         |   |   |       |                |              |                        |
|---------|---|---|-------|----------------|--------------|------------------------|
| IItpm2  | - | x | -     | -              | II tpm 47    | t-p 7, t-p 8, t-p 9    |
| IItpm3  | x | - | -     | SrA.Pm, Ax.Pml | II tpm 46b ? | t-p 10, t-p 11, t-p 18 |
| IItpm4  | x | x | 28    | -              | -            | t-p 12                 |
| IItpm5  | - | - | -     | -              | -            | t-p 15                 |
| IItpm6  | x | x | 31    | -              | II tpm 49    | t-p 13                 |
| IItpm7  | x | x | 33    | -              | II tpm 48    | -                      |
| IItpm8  | x | x | 32    | Ax.PmS         | -            | t-p 14                 |
| IItpm9  | x | x | 29/30 | -              | -            | t-p 16                 |
| IItpm10 | x | x | 34    | -              | II ppm 56    | t-p 19                 |
| IItpm11 | - | - | -     | -              | -            | t-p 17                 |
| IItpm12 | - | - | -     | -              | -            | p 1                    |
| IItpm13 | - | - | -     | -              | ?            | ?                      |
| IIppm1  | - | - | -     | -              | II im 65a    | p 2                    |
| IIppm2  | - | - | -     | -              | II pm 54a, b | p 3                    |
| IIspm1  | - | - | -     | -              | II ppm 55    | p-s 1                  |
| IIspm2  | x | - | 35    | -              | II zm 61a    | p-s 2                  |
| IIspm3  | - | - | -     | -              | -            | p-s 6                  |
| IIspm4  | - | - | -     | -              | -            | p-s 7                  |
| IIspm5  | - | - | -     | -              | -            | p-s 3                  |
| IIspm6  | - | - | -     | -              | -            | p-s 9                  |
| IIspm7  | - | - | -     | -              | -            | p-s 5                  |
| IIspm8  | - | - | -     | -              | -            | p-ti(cx) 1             |
| IIpcm1  | x | x | 21    | -              | -            | p-ti(cx) 2, p-ti(cx) 3 |
| IIpcm2  | x | x | 22    | -              | II cpm 51    | p-cx 4, p-cx 6         |
| IIpcm3  | - | - | -     | P.Cm           | -            | p-cx 5                 |
| IIpcm4  | x | x | 36    | BA.Trm         | II cpm 52    | p-tr 2                 |
| IIpcm5  | - | - | -     | P.Trm          | II cpm 50    | p-tr 1                 |
| IIpcm6  | x | x | 39    | Fm             | -            | s14, s16               |
| IIvlm1  | - | - | -     | -              | -            | s 15                   |

Additional file 2: Homologisation of thoracic muscle nomenclatures used by several authors

"-" absent / "?" uncertain or no information

|                   |   |   |     |               |                        |                |
|-------------------|---|---|-----|---------------|------------------------|----------------|
| IIvlm2            | - | - | -   | iFm           | -                      | s 13           |
| IIvlm3            | - | - | -   | -             | II vlm 38              | s 11           |
| IIvlm4            | - | - | -   | -             | -                      | s 12           |
| IIvlm5            | - | - | -   | -             | II vlm 39              | p-s 13         |
| IIvlm6            | x | - | 68  | -             | -                      | p-s 10         |
| IIvlm7            | x | x | 41  | F.CmA         | -                      | s-cx 5         |
| IIscm1            | x | - | -   | -             | II bm 57               | s-cx 3         |
| IIscm2            | x | - | -   | -             | II bm 60               | s-cx 6         |
| IIscm3            | x | x | 38  | F.CmP         | II bm 59               | s-cx 2         |
| IIscm4            | - | - | -   | -             | II zm 61b              | s-cx 4         |
| IIscm5            | - | - | -   | -             | -                      | s-tr1          |
| IIscm6            | x | x | 40  | -             | II bm 58               | s-cx 1         |
| IIscm7            | x | - | -   | -             | -                      | s-cx 7         |
| <b>Metathorax</b> |   |   |     |               |                        |                |
| III dlm1          | x | x | 45  | MT.m          | III dlm 35             | t 14           |
| III dlm2          | x | x | 45' | S.LP?m        | III dlm 36, III dlm 37 | t 12, t13      |
| III dlm3          | - | - | -   | -             | III dvm 40             | ?              |
| III dvm1          | - | x | 46' | S.Esm         | III dvm 41             | t-p 5, t-p 6   |
| III dvm2          | - | - | -   | S.CmA         | -                      | t-ti 1, t-ti 2 |
| III dvm3          | x | x | 46  | S.CmA         | III dvm 43             | t-ti 3         |
| III dvm4          | x | x | 48  | -             | III dvm 43             | t-cx 5         |
| III dvm5          | x | x | 49  | PSL.Cm, S.CmP | III cpm 53             | t-cx 6, t-cx 7 |
| III dvm6          | x | - | 46  | SA.Cm, SA.Fm  | III dvm 42             | t-cx 8         |
| III dvm7          | - | - | -   | -             | III ism 44             | t-tr 1         |
| III dvm8          | x | x | 67  | -             | III tpm 46a            | t-s 1          |
| III tpm1          | - | - | -   | A?.Pm         | III tpm 47             | t-p 3          |
| III tpm2          | - | x | -   | BA.Pm         | III tpm 46b            | t-p 4, t-p 20  |
| III tpm3          | x | - | -   | -             | -                      | t-p 7, t-p 8   |

Additional file 2: Homologisation of thoracic muscle nomenclatures used by several authors

"-" absent / "?" uncertain or no information

|          |   |   |       |                |                |                        |
|----------|---|---|-------|----------------|----------------|------------------------|
| IIItpm4  | x | x | 50    | SrA.Pm, Ax.Pml | -              | t-p 10, t-p 11, t-p 18 |
| IIItpm5  | - | - | -     | -              | III tpm 49     | t-p 12                 |
| IIItpm6  | x | x | 53    | -              | III tpm 48     | t-p 15                 |
| IIItpm7  | x | x | 55    | -              | -              | t-p 13                 |
| IIItpm8  | x | x | 54    | -              | -              | -                      |
| IIItpm9  | x | x | 51/52 | Ax.PmS         | III ppm 56     | t-p 14                 |
| IIItpm10 | x | x | 56    | -              | -              | t-p 16                 |
| IIItpm11 | - | - | -     | -              | -              | t-p 19                 |
| IIItpm12 | - | - | -     | -              | -              | t-p 17                 |
| IIItpm13 | - | - | -     | -              | ?              | ?                      |
| IIIppm1  | - | - | -     | -              | III im 65a     | p 1                    |
| IIIppm2  | - | - | -     | -              | III ppm 54a, b | p 2                    |
| IIIspm1  | - | - | -     | -              | III ppm 55     | p 3                    |
| IIIspm2  | x | - | 57    | -              | III zm 61      | p-s 1                  |
| IIIspm3  | - | - | -     | -              | -              | p-s 7                  |
| IIIspm4  | - | - | -     | -              | -              | p-s 9                  |
| IIIspm5  | - | - | -     | -              | -              | p-s 5                  |
| IIIspm6  | - | - | -     | -              | ?              | ?                      |
| IIIpcm1  | x | x | 43    | -              | -              | p-ti(cx) 1             |
| IIIpcm2  | x | x | 44    | -              | III cpm 51     | p-ti(cx) 2, p-ti(cx) 3 |
| IIIpcm3  | - | - | -     | -              | -              | p-cx 4, p-cx 6         |
| IIIpcm4  | x | x | 58    | P.Cm           | III cpm 52     | p-cx 5                 |
| IIIpcm5  | - | - | -     | BA.Trm         | III cpm 50     | p-tr 2                 |
| IIIpcm6  | x | x | 62    | P.Trm          | -              | p-tr 1                 |
| IIIpcm7  | - | - | -     | -              | -              | p-cx 8                 |
| IIIvlm1  | - | - | -     | Fm             | -              | s 14, s16              |
| IIIvlm2  | x | x | 65    | -              | III vlm 64     | s 20                   |
| IIIvlm3  | x | x | 66    | -              | -              | s 12                   |
| IIIscm1  | x | - | -     | F.CmA          | III bm 57      | s-cx 5                 |

Additional file 2: Homologisation of thoracic muscle nomenclatures used by several authors

"-" absent / "?" uncertain or no information

|         |   |   |    |       |            |        |
|---------|---|---|----|-------|------------|--------|
| IIIscm2 | x | - | -  | -     | III bm 60  | s-cx 3 |
| IIIscm3 | x | x | 61 | -     | III bm 59  | s-cx 6 |
| IIIscm4 | - | - | -  | F.CmP | -          | s-cx 2 |
| IIIscm5 | - | - | -  | -     | -          | s-cx 4 |
| IIIscm6 | x | x | 63 | -     | III cpm 58 | s-tr 1 |
|         |   |   |    |       |            |        |
