# Supplementary material for: The thorax musculature of Anisoptera (Insecta: Odonata) nymphs and its evolutionary relevance
Source: PubMed Central journal article supplement (PMC4228402; doi:10.1186/1471-2148-13-237), 2013-11-01
Supplement: 1471-2148-13-237-S3.pdf [file 1471-2148-13-237-S3.pdf]

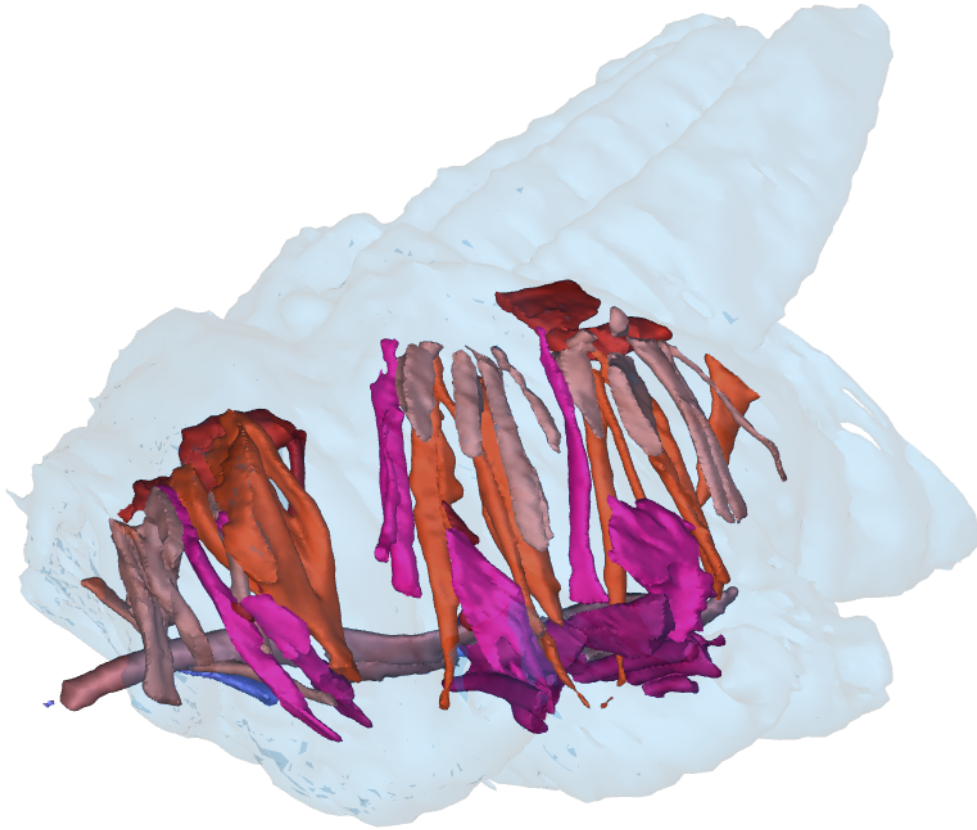

**5XXjhcbU'Z'Y'** -model of thoracic musculature of *Sympetrum vulgatum* nymph; reconstructed from SR $\mu$ CT data showing transparent cuticle and muscles grouped as dorsal longitudinal (â|{ ), ventral longitudinal (ç|{ ), dorso-ventral (âç{ ), tergo-pleural (d|{ ), sterno-pleural (•|{ ), sterno-coxal (•&{ ) and pleuro-coxal (|&{ ) muscles. After clicking the figure the model can be manipulated.
